# Supplementary material for: Alterations of the Gut Microbiota in Patients with Diabetic Nephropathy
Source: PubMed Central journal article supplement (PMC9430528; doi:10.1128/spectrum.00324-22), 2022-07-14
Supplement: spectrum.00324-22-s0001.pdf [file spectrum.00324-22-s0001.pdf]

### Supplementary tables

Table S1 The relative abundance of the top 15 bacteria of the gut microbiota in the CON, T2DM, and DN groups at the phylum level (%  $\bar{x}\pm s$ )

| phylum                            | CON         | T2DM        | DN          | P 值   |
|-----------------------------------|-------------|-------------|-------------|-------|
| <i>Bacteroidetes</i>              | 61.94±22.73 | 60.30±26.01 | 67.64±14.37 | 0.881 |
| <i>Firmicutes</i>                 | 28.98±16.40 | 27.42±18.80 | 24.15±9.97  | 0.729 |
| <i>Proteobacteria</i>             | 5.11±7.94   | 8.79±9.49   | 4.27±5.29   | 0.525 |
| <i>Actinobacteria</i>             | 0.34±0.26   | 1.47±2.30   | 1.07±1.18   | 0.443 |
| <i>Candidatus_Melainabacteria</i> | 0.55±1.03   | 0.32±0.99   | 0.06±0.08   | 0.245 |
| <i>Uroviricota</i>                | 0.53±1.29   | 0.04±0.04   | 0.16±0.29   | 0.564 |
| <i>Fusobacteria</i>               | 0.35±1.24   | 0.16±0.51   | 0.01±0.01   | 0.198 |
| <i>Tenericutes</i>                | 0.24±0.63   | 0.02±0.06   | 0.15±0.19   | 0.167 |
| <i>Verrucomicrobia</i>            | 0.10±0.17   | 0.05±0.04   | 0.18±0.32   | 0.889 |
| <i>Euryarchaeota</i>              | 0.02±0.02   | 0.02±0.04   | 0.16±0.26   | 0.054 |
| <i>Lentisphaerae</i>              | 0.00±0.00   | 0.00±0.00   | 0.10±0.35   | 0.196 |
| <i>Chlamydiae</i>                 | 0.05±0.13   | 0.01±0.01   | 0.01±0.01   | 0.295 |
| <i>Synergistetes</i>              | 0.00±0.01   | 0.05±0.17   | 0.00±0.01   | 0.090 |
| <i>Spirochaetes</i>               | 0.01±0.01   | 0.01±0.01   | 0.01±0.02   | 0.590 |
| <i>Crenarchaeota</i>              | 0.02±0.07   | 0.00±0.00   | 0.00±0.00   | 0.111 |

Table S2 The relative abundance of the top 15 bacteria of the gut microbiota in the CON, T2DM, and DN groups at the genus level (% ,  $\bar{x}\pm s$ )

| genus                   | CON         | T2DM        | DN          | <i>P</i> 值 |
|-------------------------|-------------|-------------|-------------|------------|
| <i>Bacteroides</i>      | 17.94±14.18 | 26.67±17.41 | 29.22±15.23 | 0.109      |
| <i>Prevotella</i>       | 27.31±30.01 | 11.35±20.20 | 16.28±21.11 | 0.429      |
| <i>Phocaeicola</i>      | 10.13±8.80  | 12.80±9.26  | 9.59±7.42   | 0.538      |
| <i>Faecalibacterium</i> | 6.50±5.02   | 7.81±6.89   | 3.78±2.51   | 0.169      |
| <i>Alistipes</i>        | 1.91±1.88   | 2.71±2.90   | 4.74±5.01   | 0.339      |
| <i>Parabacteroides</i>  | 1.88±1.15   | 3.94±3.56   | 3.28±1.90   | 0.066      |
| <i>Clostridium</i>      | 2.82±2.27   | 2.09±1.84   | 2.48±1.68   | 0.679      |
| <i>Roseburia</i>        | 2.39±2.00   | 2.30±2.72   | 1.62±0.86   | 0.585      |
| <i>Eubacterium</i>      | 1.98±1.37   | 2.02±2.67   | 1.66±2.31   | 0.417      |
| <i>Escherichia</i>      | 2.07±6.21   | 2.63±4.62   | 0.61±0.66   | 0.052      |
| <i>Ruminococcus</i>     | 1.60±0.89   | 1.10±0.99   | 1.63±1.08   | 0.156      |
| <i>Klebsiella</i>       | 0.46±0.68   | 2.87±5.67   | 0.60±1.00   | 0.199      |
| <i>Blautia</i>          | 1.03±0.79   | 1.12±1.06   | 1.00±0.75   | 0.942      |
| <i>Lachnospira</i>      | 0.90±0.61   | 0.95±1.02   | 0.68±1.67*  | 0.022      |
| <i>Bifidobacterium</i>  | 0.20±0.19   | 1.03±2.12   | 0.77±0.99   | 0.606      |

\**P*<0.05, compared with CON groups

Table S3 The relative abundance of the top 15 bacteria of the gut microbiota in the CON, T2DM, and DN groups at the species level (% ,  $\bar{x}\pm s$ )

| species                             | CON         | T2DM       | DN          | P 值   |
|-------------------------------------|-------------|------------|-------------|-------|
| <i>Prevotella copri</i>             | 22.13±25.77 | 8.24±16.86 | 11.08±18.47 | 0.197 |
| <i>Phocaeicola vulgatus</i>         | 3.76±3.47   | 6.30±4.25  | 4.88±3.59   | 0.230 |
| <i>Faecalibacterium prausnitzii</i> | 4.31±3.38   | 5.12±4.31  | 2.56±1.66   | 0.177 |
| <i>Phocaeicola plebeius</i>         | 4.40±6.30   | 3.06±5.33  | 1.89±4.81   | 0.374 |
| <i>Bacteroides uniformis</i>        | 1.91±2.19   | 2.88±2.92  | 4.19±2.40   | 0.064 |
| <i>Bacteroides ovatus</i>           | 1.89±2.31   | 2.98±3.02  | 2.73±2.32   | 0.379 |
| <i>Bacteroides fragilis</i>         | 2.47±6.46   | 3.25±5.56* | 1.24±0.66   | 0.034 |
| <i>Bacteroides stercoris</i>        | 0.88±1.14   | 1.52±2.04  | 3.31±3.74*  | 0.031 |
| <i>Escherichia coli</i>             | 2.06±6.17   | 2.62±4.59  | 0.61±0.66   | 0.051 |
| <i>Phocaeicola dorei</i>            | 1.20±0.87   | 2.22±1.36  | 1.68±1.19   | 0.161 |
| <i>Bacteroides xylanisolvens</i>    | 1.07±1.16   | 2.03±2.64  | 1.34±1.02   | 0.552 |
| <i>Bacteroides thetaiotaomicron</i> | 1.21±1.34   | 1.40±1.18  | 1.58±1.06   | 0.292 |
| <i>Bacteroides caccae</i>           | 0.69±0.59   | 1.31±1.34  | 1.29±0.92   | 0.115 |
| <i>Parabacteroides merdae</i>       | 0.64±0.44   | 1.33±1.48  | 0.98±0.65   | 0.316 |
| <i>Parabacteroides distasonis</i>   | 0.52±0.35   | 1.05±0.80  | 1.06±0.71   | 0.606 |
| <i>[Eubacterium]_rectale</i>        | 0.01±0.01   | 0.01±0.01  | 0.01±0.01   | 0.239 |
| <i>Lachnospiraceae_bacterium</i>    | 0.01±0.01   | 0.01±0.00  | 0.01±0.01   | 0.386 |
| <i>Prevotella_sp.</i>               | 0.01±0.01   | 0.00±0.01  | 0.01±0.01   | 0.184 |
| <i>Bacteroides_sp.</i>              | 0.00±0.00   | 0.01±0.01  | 0.01±0.01   | 0.750 |
| <i>Eubacterium_sp.</i>              | 0.01±0.01   | 0.01±0.01  | 0.01±0.01   | 0.266 |
| <i>Phocaeicola_coprocola</i>        | 0.00±0.00   | 0.01±0.01  | 0.01±0.01   | 0.975 |
| <i>Clostridia_bacterium</i>         | 0.01±0.01   | 0.00±0.00  | 0.01±0.01   | 0.309 |

|                                     |           |           |            |       |
|-------------------------------------|-----------|-----------|------------|-------|
| <i>Klebsiella_pneumoniae</i>        | 0.00±0.00 | 0.01±0.03 | 0.00±0.01  | 0.166 |
| <i>Ruminococcaceae_bacterium</i>    | 0.01±0.01 | 0.00±0.00 | 0.01±0.00  | 0.154 |
| <i>Lachnospira_eligens</i>          | 0.01±0.01 | 0.01±0.01 | 0.00±0.01  | 0.090 |
| <i>Alistipes_putredinis</i>         | 0.00±0.00 | 0.00±0.01 | 0.01±0.02  | 0.149 |
| <i>Faecalibacterium_sp.</i>         | 0.01±0.00 | 0.01±0.01 | 0.00±0.00  | 0.124 |
| <i>Roseburia_inulinivorans</i>      | 0.01±0.01 | 0.00±0.01 | 0.00±0.00  | 0.167 |
| <i>Bacteroides_eggerthii</i>        | 0.00±0.00 | 0.00±0.00 | 0.01±0.01* | 0.042 |
| <i>Bacteroides_cellulosilyticus</i> | 0.00±0.00 | 0.00±0.00 | 0.01±0.02  | 0.220 |

---

\* $P < 0.05$ , compared with CON groups

Table S4 AUC and 95%CI of renal function related indexes distinguishing DN from CON and T2DM

| Parameters | CON-DN |               | T2DM-DN |               |
|------------|--------|---------------|---------|---------------|
|            | AUC    | 95%CI         | AUC     | 95%CI         |
| ACR        | 0.881  | 0.718 - 1.000 | 0.826   | 0.647 - 1.000 |
| ALB        | 0.815  | 0.622 - 1.000 | 0.785   | 0.592 - 0.977 |
| UCR        | 0.839  | 0.642 - 1.000 | 0.757   | 0.556 - 0.957 |
| UA         | 0.929  | 0.830 - 1.000 | 0.635   | 0.402 - 0.869 |
| UREA       | 0.738  | 0.532 - 0.944 | 0.583   | 0.338 - 0.829 |
| SCR        | 0.637  | 0.416 - 0.857 | 0.520   | 0.277 - 0.764 |
| BUN/CR     | 0.518  | 0.285 - 0.750 | 0.524   | 0.282 - 0.766 |
